# Supplementary material for: E2F4DN Transgenic Mice: A Tool for the Evaluation of E2F4 as a Therapeutic Target in Neuropathology and Brain Aging
Source: Preprints.org preprint supplement (doi:10.20944/preprints202209.0069.v1), 2022-09-05
Supplement: Supplementary file 1 [file supplementary]

## Sheet: Hoja1
Category	Term	Count	%	PValue	Genes	List Total	Pop Hits	Pop Total	Fold Enrichment	Bonferroni	Benjamini	FDR
GOTERM_CC_ALL	GO:0043228~non-membrane-bounded organelle	55	61.1111	1.47971e-15	TOP2A, TRRAP, FMR1, PSIP1, HBA-A2, SMC3, SMC2, CSRP2, TRIM28, RUVBL2, RUVBL1, UPP2, DSP, USP7, PARP1, DYNLL1, RANGAP1, POLRMT, SMC1A, SENP3, POU5F1, DDB1, MSH6, SFPQ, MSH2, DNAJC7, SNRPG, MCM3, KPNB1, CUL5, DDX21, AURKA, FXR1, CCNB1, HSPH1, FXR2, HSF1, E2F1, ECT2, SF3B1, IVNS1ABP, NPM1, IQSEC2, HSPA4, PLK1, NAP1L1, ZWINT, KIF18A, SCCPDH, MYBBP1A, YEATS2, VAPA, HNRNPC, CEP41, EIF3A	86	4786	20828	2.78317	6.07625e-13	6.22956e-13	5.23816e-13
GOTERM_CC_ALL	GO:0043232~intracellular non-membrane-bounded organelle	54	60	7.30935e-15	TOP2A, TRRAP, FMR1, PSIP1, HBA-A2, SMC3, SMC2, CSRP2, TRIM28, RUVBL2, RUVBL1, UPP2, DSP, USP7, PARP1, DYNLL1, RANGAP1, POLRMT, SMC1A, SENP3, POU5F1, DDB1, MSH6, SFPQ, MSH2, DNAJC7, SNRPG, MCM3, KPNB1, CUL5, DDX21, AURKA, FXR1, CCNB1, HSPH1, FXR2, HSF1, E2F1, ECT2, SF3B1, IVNS1ABP, NPM1, HSPA4, PLK1, NAP1L1, ZWINT, KIF18A, SCCPDH, MYBBP1A, YEATS2, VAPA, HNRNPC, CEP41, EIF3A	86	4768	20828	2.74288	3.08487e-12	1.53862e-12	1.29376e-12
GOTERM_CC_ALL	GO:0005694~chromosome	30	33.3333	3.50244e-14	TOP2A, CUL5, TRRAP, FMR1, DDX21, PSIP1, SMC3, SMC2, CCNB1, TRIM28, RUVBL2, HSF1, RUVBL1, E2F1, SF3B1, USP7, PARP1, PLK1, NAP1L1, DYNLL1, RANGAP1, SMC1A, ZWINT, POU5F1, DDB1, MSH6, KIF18A, SFPQ, MSH2, MCM3	86	1352	20828	5.37395	1.47232e-11	4.91509e-12	4.13288e-12
GOTERM_CC_ALL	GO:0032991~macromolecular complex	59	65.5556	4.27872e-13	TOP2A, TRRAP, FMR1, HBA-A2, SMC3, SMC2, TRIM28, RUVBL2, RUVBL1, WDR5, UBAP2L, USP7, PARP1, DICER1, DYNLL1, RANGAP1, POLRMT, SMC1A, SENP3, POU5F1, HCFC1, DDB1, MSH6, SFPQ, MSH2, THRAP3, SNRPG, MCM3, KPNB1, SEC23A, CUL5, AURKA, FXR1, CCNB1, BCLAF1, HSPH1, FXR2, HSF1, E2F1, ECT2, PRPS1L1, SF3B1, PRPS1L3, WDTC1, NXF7, RANBP2, NPM1, PLK1, SAAL1, ZWINT, AIMP1, KIF18A, PFKL, MYBBP1A, YEATS2, HNRNPC, SLI…	86	6266	20828	2.2804	1.80137e-10	3.60408e-11	3.03051e-11
GOTERM_CC_ALL	GO:0044427~chromosomal part	27	30	4.28038e-13	TOP2A, CUL5, TRRAP, FMR1, PSIP1, SMC3, SMC2, CCNB1, TRIM28, RUVBL2, HSF1, RUVBL1, E2F1, SF3B1, PARP1, PLK1, NAP1L1, DYNLL1, RANGAP1, SMC1A, ZWINT, POU5F1, DDB1, MSH6, KIF18A, SFPQ, MCM3	86	1164	20828	5.61772	1.80184e-10	3.60408e-11	3.03051e-11
GOTERM_CC_ALL	GO:0043234~protein complex	41	45.5556	3.23663e-11	TOP2A, SEC23A, TRRAP, FMR1, HBA-A2, SMC3, SMC2, AURKA, CCNB1, BCLAF1, TRIM28, RUVBL2, HSF1, RUVBL1, E2F1, WDR5, UBAP2L, ECT2, NXF7, RANBP2, PARP1, PLK1, SAAL1, DYNLL1, RANGAP1, SMC1A, ZWINT, POU5F1, HCFC1, MSH6, AIMP1, KIF18A, SFPQ, MYBBP1A, YEATS2, MSH2, THRAP3, SNRPG, MCM3, KPNB1, EIF3A	86	3392	20828	2.92737	1.36262e-08	2.27104e-09	1.90961e-09
GOTERM_CC_ALL	GO:0005634~nucleus	62	68.8889	6.78298e-11	TOP2A, TRRAP, FMR1, PSIP1, SMC3, SMC2, CSRP2, TRIM28, RUVBL2, RUVBL1, WDR5, UBAP2L, USP7, PARP1, DICER1, DYNLL1, RANGAP1, SMC1A, SENP3, POU5F1, HCFC1, DDB1, MSH6, SFPQ, MSH2, DNAJC7, THRAP3, SNRPG, MCM3, KPNB1, CUL5, DDX21, AURKA, FXR1, CCNB1, BCLAF1, HSPH1, FXR2, HSF1, E2F1, ECT2, SF3B1, WDTC1, NXF7, RANBP2, IVNS1ABP, NPM1, HSPA4, PLK1, SAAL1, NAP1L1, ZWINT, AIMP1, KIF18A, MYBBP1A, YEATS2, VAPA,…	86	7693	20828	1.95184	2.85563e-08	4.07948e-09	3.43025e-09
GOTERM_CC_ALL	GO:0005654~nucleoplasm	43	47.7778	8.56205e-11	TOP2A, TRRAP, FMR1, DDX21, PSIP1, SMC3, SMC2, AURKA, BCLAF1, HSPH1, TRIM28, RUVBL2, HSF1, RUVBL1, E2F1, WDR5, ECT2, SF3B1, NXF7, RANBP2, USP7, NPM1, PARP1, SAAL1, RANGAP1, SMC1A, SENP3, ZWINT, POU5F1, HCFC1, DDB1, MSH6, SFPQ, YEATS2, MSH2, DNAJC7, THRAP3, SNRPG, MCM3, HBP1, HNRNPC, KPNB1, EIF3A	86	3839	20828	2.71269	3.60462e-08	4.50578e-09	3.78871e-09
GOTERM_CC_ALL	GO:0044428~nuclear part	48	53.3333	2.09124e-10	TOP2A, TRRAP, FMR1, DDX21, PSIP1, SMC3, SMC2, AURKA, BCLAF1, HSPH1, TRIM28, RUVBL2, HSF1, RUVBL1, E2F1, WDR5, UBAP2L, ECT2, SF3B1, NXF7, RANBP2, USP7, NPM1, PARP1, PLK1, SAAL1, DYNLL1, RANGAP1, SMC1A, SENP3, ZWINT, POU5F1, HCFC1, DDB1, MSH6, SFPQ, MYBBP1A, YEATS2, MSH2, DNAJC7, VAPA, THRAP3, SNRPG, MCM3, HBP1, HNRNPC, KPNB1, EIF3A	86	4865	20828	2.3895	8.80411e-08	9.78235e-09	8.22554e-09
GOTERM_CC_ALL	GO:0031981~nuclear lumen	45	50	3.42146e-10	TOP2A, TRRAP, FMR1, DDX21, PSIP1, SMC3, SMC2, AURKA, BCLAF1, HSPH1, TRIM28, RUVBL2, HSF1, RUVBL1, E2F1, WDR5, ECT2, SF3B1, NXF7, RANBP2, USP7, NPM1, PARP1, PLK1, SAAL1, RANGAP1, SMC1A, SENP3, ZWINT, POU5F1, HCFC1, DDB1, MSH6, SFPQ, MYBBP1A, YEATS2, MSH2, DNAJC7, THRAP3, SNRPG, MCM3, HBP1, HNRNPC, KPNB1, EIF3A	86	4367	20828	2.49562	1.44043e-07	1.44043e-08	1.2112e-08
GOTERM_CC_ALL	GO:0070013~intracellular organelle lumen	47	52.2222	1.14685e-09	TOP2A, TRRAP, FMR1, DDX21, PSIP1, SMC3, SMC2, AURKA, CCNB1, BCLAF1, HSPH1, TRIM28, RUVBL2, HSF1, RUVBL1, E2F1, WDR5, ECT2, SF3B1, NXF7, RANBP2, USP7, NPM1, PARP1, PLK1, SAAL1, POLRMT, RANGAP1, SMC1A, SENP3, ZWINT, POU5F1, HCFC1, DDB1, MSH6, SFPQ, MYBBP1A, YEATS2, MSH2, DNAJC7, THRAP3, SNRPG, MCM3, HBP1, HNRNPC, KPNB1, EIF3A	86	4908	20828	2.31922	4.82825e-07	3.74031e-08	3.14506e-08
GOTERM_CC_ALL	GO:0043233~organelle lumen	47	52.2222	1.15497e-09	TOP2A, TRRAP, FMR1, DDX21, PSIP1, SMC3, SMC2, AURKA, CCNB1, BCLAF1, HSPH1, TRIM28, RUVBL2, HSF1, RUVBL1, E2F1, WDR5, ECT2, SF3B1, NXF7, RANBP2, USP7, NPM1, PARP1, PLK1, SAAL1, POLRMT, RANGAP1, SMC1A, SENP3, ZWINT, POU5F1, HCFC1, DDB1, MSH6, SFPQ, MYBBP1A, YEATS2, MSH2, DNAJC7, THRAP3, SNRPG, MCM3, HBP1, HNRNPC, KPNB1, EIF3A	86	4909	20828	2.31875	4.86241e-07	3.74031e-08	3.14506e-08
GOTERM_CC_ALL	GO:0031974~membrane-enclosed lumen	47	52.2222	1.15497e-09	TOP2A, TRRAP, FMR1, DDX21, PSIP1, SMC3, SMC2, AURKA, CCNB1, BCLAF1, HSPH1, TRIM28, RUVBL2, HSF1, RUVBL1, E2F1, WDR5, ECT2, SF3B1, NXF7, RANBP2, USP7, NPM1, PARP1, PLK1, SAAL1, POLRMT, RANGAP1, SMC1A, SENP3, ZWINT, POU5F1, HCFC1, DDB1, MSH6, SFPQ, MYBBP1A, YEATS2, MSH2, DNAJC7, THRAP3, SNRPG, MCM3, HBP1, HNRNPC, KPNB1, EIF3A	86	4909	20828	2.31875	4.86241e-07	3.74031e-08	3.14506e-08
GOTERM_CC_ALL	GO:0044424~intracellular part	83	92.2222	8.17078e-09	TOP2A, VARS, TRRAP, FMR1, PSIP1, HBA-A2, SMC3, SMC2, CSRP2, TRIM28, MDK, RUVBL2, RUVBL1, WDR5, UBAP2L, UPP2, KCMF1, DSP, USP7, PARP1, DICER1, DYNLL1, RANGAP1, POLRMT, SMC1A, SENP3, POU5F1, HCFC1, DDB1, MSH6, SFPQ, MSH2, DNAJC7, THRAP3, SNRPG, MCM3, KPNB1, SEC23A, CUL5, GSTCD, GMPS, DDX21, NT5C2, HSPBP1, AURKA, FXR1, CCNB1, BCLAF1, HSPH1, FXR2, HSF1, E2F1, TDH, ECT2, PRPS1L1, SF3B1, PRPS1L3, WDTC1…	86	15115	20828	1.3299	3.43989e-06	2.45575e-07	2.06493e-07
GOTERM_CC_ALL	GO:0005622~intracellular	83	92.2222	8.84203e-09	TOP2A, VARS, TRRAP, FMR1, PSIP1, HBA-A2, SMC3, SMC2, CSRP2, TRIM28, MDK, RUVBL2, RUVBL1, WDR5, UBAP2L, UPP2, KCMF1, DSP, USP7, PARP1, DICER1, DYNLL1, RANGAP1, POLRMT, SMC1A, SENP3, POU5F1, HCFC1, DDB1, MSH6, SFPQ, MSH2, DNAJC7, THRAP3, SNRPG, MCM3, KPNB1, SEC23A, CUL5, GSTCD, GMPS, DDX21, NT5C2, HSPBP1, AURKA, FXR1, CCNB1, BCLAF1, HSPH1, FXR2, HSF1, E2F1, TDH, ECT2, PRPS1L1, SF3B1, PRPS1L3, WDTC1…	86	15131	20828	1.32849	3.72249e-06	2.45575e-07	2.06493e-07
GOTERM_CC_ALL	GO:0005737~cytoplasm	74	82.2222	9.333e-09	TOP2A, VARS, TRRAP, FMR1, HBA-A2, SMC2, CSRP2, MDK, RUVBL2, RUVBL1, UBAP2L, UPP2, KCMF1, DSP, USP7, PARP1, DICER1, DYNLL1, RANGAP1, POLRMT, SMC1A, SENP3, POU5F1, HCFC1, DDB1, MSH6, SFPQ, DNAJC7, THRAP3, SNRPG, MCM3, KPNB1, SEC23A, CUL5, GSTCD, GMPS, DDX21, NT5C2, HSPBP1, AURKA, FXR1, CCNB1, BCLAF1, HSPH1, FXR2, HSF1, E2F1, TDH, ECT2, PRPS1L1, PRPS1L3, WDTC1, NXF7, RANBP2, IVNS1ABP, NPM1, IQSEC2, …	86	11869	20828	1.50996	3.92918e-06	2.45575e-07	2.06493e-07
GOTERM_CC_ALL	GO:0044451~nucleoplasm part	22	24.4444	1.11255e-08	NPM1, USP7, PARP1, TRRAP, FMR1, SENP3, ZWINT, HCFC1, BCLAF1, SFPQ, YEATS2, THRAP3, RUVBL2, HSF1, RUVBL1, WDR5, MCM3, HBP1, HNRNPC, ECT2, SF3B1, NXF7	86	1208	20828	4.41067	4.68383e-06	2.7552e-07	2.31673e-07
GOTERM_CC_ALL	GO:0072686~mitotic spindle	10	11.1111	2.55934e-08	KIF18A, YEATS2, PLK1, HSF1, ECT2, DYNLL1, RANGAP1, SMC1A, SMC3, AURKA	86	166	20828	14.5895	1.07748e-05	5.98601e-07	5.03337e-07
GOTERM_CC_ALL	GO:0000775~chromosome, centromeric region	11	12.2222	3.09883e-08	TOP2A, KIF18A, CCNB1, FMR1, PLK1, HSF1, DYNLL1, RANGAP1, SMC1A, SMC3, ZWINT	86	228	20828	11.6844	1.3046e-05	6.86636e-07	5.77362e-07
GOTERM_CC_ALL	GO:0005829~cytosol	39	43.3333	2.59736e-07	SEC23A, CUL5, VARS, FMR1, GMPS, DDX21, HBA-A2, NT5C2, AURKA, FXR1, CCNB1, FXR2, HSPH1, RUVBL2, HSF1, RUVBL1, UPP2, ECT2, WDTC1, IVNS1ABP, KCMF1, USP7, NPM1, HSPA4, DICER1, DYNLL1, RANGAP1, SMC1A, PAICS, ZWINT, POU5F1, MSH6, AIMP1, PFKL, DNAJC7, SNRPG, HNRNPC, KPNB1, EIF3A	86	4197	20828	2.25048	0.000109343	5.46744e-06	4.59733e-06
GOTERM_CC_ALL	GO:0000785~chromatin	15	16.6667	4.43044e-07	TRRAP, PLK1, PSIP1, NAP1L1, SMC3, POU5F1, SMC2, MSH6, SFPQ, TRIM28, RUVBL2, HSF1, RUVBL1, E2F1, SF3B1	86	662	20828	5.4876	0.000186504	8.83148e-06	7.426e-06
GOTERM_CC_ALL	GO:0015630~microtubule cytoskeleton	21	23.3333	4.61503e-07	TOP2A, NPM1, FMR1, PLK1, DYNLL1, SMC3, RANGAP1, SMC1A, AURKA, KIF18A, CCNB1, HSPH1, VAPA, YEATS2, RUVBL2, HSF1, E2F1, MCM3, CEP41, ECT2, EIF3A	86	1371	20828	3.70963	0.000194274	8.83148e-06	7.426e-06
GOTERM_CC_ALL	GO:0005819~spindle	12	13.3333	9.11693e-07	NPM1, KIF18A, CCNB1, YEATS2, PLK1, HSF1, ECT2, DYNLL1, RANGAP1, SMC1A, SMC3, AURKA	86	412	20828	7.05396	0.000383749	1.6688e-05	1.40322e-05
GOTERM_CC_ALL	GO:0098687~chromosomal region	11	12.2222	1.61661e-06	TOP2A, KIF18A, CCNB1, FMR1, PLK1, HSF1, DYNLL1, RANGAP1, SMC1A, SMC3, ZWINT	86	350	20828	7.61156	0.000680361	2.8358e-05	2.3845e-05
GOTERM_CC_ALL	GO:1990234~transferase complex	16	17.7778	2.3866e-06	CUL5, TRRAP, POLRMT, SENP3, HCFC1, DDB1, PFKL, CCNB1, YEATS2, RUVBL2, RUVBL1, SNRPG, WDR5, PRPS1L1, PRPS1L3, WDTC1	86	878	20828	4.41341	0.00100426	3.85507e-05	3.24155e-05
GOTERM_CC_ALL	GO:0000776~kinetochore	8	8.88889	2.46409e-06	KIF18A, CCNB1, PLK1, HSF1, DYNLL1, RANGAP1, SMC1A, ZWINT	86	148	20828	13.0911	0.00103685	3.85507e-05	3.24155e-05
GOTERM_CC_ALL	GO:1902562~H4 histone acetyltransferase complex	6	6.66667	2.47237e-06	YEATS2, TRRAP, RUVBL2, RUVBL1, WDR5, HCFC1	86	53	20828	27.4173	0.00104033	3.85507e-05	3.24155e-05
GOTERM_CC_ALL	GO:0043231~intracellular membrane-bounded organelle	68	75.5556	4.1914e-06	TOP2A, VARS, TRRAP, FMR1, PSIP1, SMC3, SMC2, CSRP2, TRIM28, RUVBL2, RUVBL1, WDR5, UBAP2L, USP7, PARP1, DICER1, DYNLL1, RANGAP1, POLRMT, SMC1A, SENP3, POU5F1, HCFC1, DDB1, MSH6, SFPQ, MSH2, DNAJC7, THRAP3, SNRPG, MCM3, KPNB1, SEC23A, CUL5, DDX21, HSPBP1, AURKA, FXR1, CCNB1, BCLAF1, HSPH1, FXR2, HSF1, E2F1, TDH, ECT2, SF3B1, WDTC1, NXF7, RANBP2, IVNS1ABP, NPM1, HSPA4, PLK1, SAAL1, NAP1L1, ZWINT, AI…	86	11474	20828	1.4353	0.00176303	6.12113e-05	5.14698e-05
GOTERM_CC_ALL	GO:0044422~organelle part	61	67.7778	4.21645e-06	TOP2A, TRRAP, FMR1, PSIP1, HBA-A2, SMC3, SMC2, CSRP2, TRIM28, RUVBL2, RUVBL1, WDR5, UBAP2L, UPP2, DSP, USP7, PARP1, DYNLL1, RANGAP1, POLRMT, SMC1A, SENP3, POU5F1, HCFC1, DDB1, MSH6, SFPQ, MSH2, DNAJC7, THRAP3, SNRPG, MCM3, KPNB1, SEC23A, CUL5, DDX21, AURKA, FXR1, CCNB1, BCLAF1, HSPH1, HSF1, E2F1, ECT2, SF3B1, NXF7, RANBP2, NPM1, IQSEC2, PLK1, SAAL1, NAP1L1, ZWINT, KIF18A, MYBBP1A, YEATS2, VAPA, H…	86	9608	20828	1.53761	0.00177356	6.12113e-05	5.14698e-05
GOTERM_CC_ALL	GO:0005856~cytoskeleton	26	28.8889	6.17299e-06	TOP2A, FMR1, SMC3, AURKA, CCNB1, HSPH1, RUVBL2, HSF1, E2F1, UPP2, ECT2, IVNS1ABP, DSP, NPM1, PLK1, DYNLL1, RANGAP1, SMC1A, KIF18A, YEATS2, DNAJC7, VAPA, MCM3, CEP41, HNRNPC, EIF3A	86	2392	20828	2.63246	0.00259546	8.66276e-05	7.28412e-05
GOTERM_CC_ALL	GO:0071339~MLL1 complex	5	5.55556	7.47223e-06	RUVBL2, RUVBL1, WDR5, SENP3, HCFC1	86	31	20828	39.0623	0.00314088	0.000101478	8.53281e-05
GOTERM_CC_ALL	GO:0044665~MLL1/2 complex	5	5.55556	8.51319e-06	RUVBL2, RUVBL1, WDR5, SENP3, HCFC1	86	32	20828	37.8416	0.00357765	0.000112002	9.41771e-05
GOTERM_CC_ALL	GO:1902494~catalytic complex	20	22.2222	1.20662e-05	CUL5, TRRAP, DICER1, DYNLL1, POLRMT, SENP3, HCFC1, DDB1, PFKL, CCNB1, YEATS2, RUVBL2, RUVBL1, SNRPG, WDR5, HNRNPC, PRPS1L1, SF3B1, PRPS1L3, WDTC1	86	1550	20828	3.12498	0.00506701	0.000153935	0.000129437
GOTERM_CC_ALL	GO:0097431~mitotic spindle pole	5	5.55556	1.71522e-05	PLK1, HSF1, SMC1A, SMC3, AURKA	86	38	20828	31.8666	0.00719511	0.000212384	0.000178584
GOTERM_CC_ALL	GO:0044446~intracellular organelle part	58	64.4444	1.87162e-05	TOP2A, TRRAP, FMR1, PSIP1, HBA-A2, SMC3, SMC2, TRIM28, RUVBL2, RUVBL1, WDR5, UBAP2L, UPP2, DSP, USP7, PARP1, DYNLL1, RANGAP1, POLRMT, SMC1A, SENP3, POU5F1, HCFC1, DDB1, MSH6, SFPQ, MSH2, DNAJC7, THRAP3, SNRPG, MCM3, KPNB1, SEC23A, CUL5, DDX21, AURKA, CCNB1, BCLAF1, HSPH1, HSF1, E2F1, ECT2, SF3B1, NXF7, RANBP2, NPM1, PLK1, SAAL1, NAP1L1, ZWINT, KIF18A, MYBBP1A, YEATS2, VAPA, HBP1, HNRNPC, CEP41, E…	86	9226	20828	1.52252	0.00784862	0.000225129	0.000189301
GOTERM_CC_ALL	GO:0034399~nuclear periphery	7	7.77778	2.43863e-05	NPM1, SFPQ, RUVBL1, PSIP1, SMC1A, SMC3, SF3B1	86	141	20828	12.0234	0.0102142	0.000285184	0.000239799
GOTERM_CC_ALL	GO:0000123~histone acetyltransferase complex	6	6.66667	2.70013e-05	YEATS2, TRRAP, RUVBL2, RUVBL1, WDR5, HCFC1	86	86	20828	16.8967	0.0113034	0.000307232	0.000258337
GOTERM_CC_ALL	GO:1990904~ribonucleoprotein complex	16	17.7778	3.7582e-05	TOP2A, NPM1, FMR1, HBA-A2, DICER1, FXR1, FXR2, RUVBL2, HSF1, RUVBL1, SNRPG, SLIRP, HNRNPC, SF3B1, EIF3A, KPNB1	86	1107	20828	3.50043	0.0156978	0.000416369	0.000350106
GOTERM_CC_ALL	GO:0043229~intracellular organelle	72	80	4.50959e-05	TOP2A, VARS, TRRAP, FMR1, PSIP1, HBA-A2, SMC3, SMC2, CSRP2, TRIM28, RUVBL2, RUVBL1, WDR5, UBAP2L, UPP2, DSP, USP7, PARP1, DICER1, DYNLL1, RANGAP1, POLRMT, SMC1A, SENP3, POU5F1, HCFC1, DDB1, MSH6, SFPQ, MSH2, DNAJC7, THRAP3, SNRPG, MCM3, KPNB1, SEC23A, CUL5, DDX21, HSPBP1, AURKA, FXR1, CCNB1, BCLAF1, HSPH1, FXR2, HSF1, E2F1, TDH, ECT2, SF3B1, WDTC1, NXF7, RANBP2, IVNS1ABP, NPM1, HSPA4, PLK1, SAAL1…	86	13256	20828	1.31543	0.0188067	0.000485741	0.000408438
GOTERM_CC_ALL	GO:0044430~cytoskeletal part	21	23.3333	4.61512e-05	DSP, TOP2A, NPM1, PLK1, DYNLL1, SMC3, RANGAP1, SMC1A, AURKA, KIF18A, CCNB1, HSPH1, YEATS2, RUVBL2, HSF1, E2F1, MCM3, UPP2, CEP41, ECT2, EIF3A	86	1862	20828	2.73142	0.0192425	0.000485741	0.000408438
GOTERM_CC_ALL	GO:1902493~acetyltransferase complex	6	6.66667	5.06738e-05	YEATS2, TRRAP, RUVBL2, RUVBL1, WDR5, HCFC1	86	98	20828	14.8277	0.0211082	0.000507945	0.000427108
GOTERM_CC_ALL	GO:0031248~protein acetyltransferase complex	6	6.66667	5.06738e-05	YEATS2, TRRAP, RUVBL2, RUVBL1, WDR5, HCFC1	86	98	20828	14.8277	0.0211082	0.000507945	0.000427108
GOTERM_CC_ALL	GO:0043226~organelle	73	81.1111	5.40062e-05	TOP2A, VARS, TRRAP, FMR1, PSIP1, HBA-A2, SMC3, SMC2, CSRP2, TRIM28, RUVBL2, RUVBL1, WDR5, UBAP2L, UPP2, DSP, USP7, PARP1, DICER1, DYNLL1, RANGAP1, POLRMT, SMC1A, SENP3, POU5F1, HCFC1, DDB1, MSH6, SFPQ, MSH2, DNAJC7, THRAP3, SNRPG, MCM3, KPNB1, SEC23A, CUL5, DDX21, HSPBP1, AURKA, FXR1, CCNB1, BCLAF1, HSPH1, FXR2, HSF1, E2F1, TDH, ECT2, SF3B1, WDTC1, NXF7, RANBP2, IVNS1ABP, NPM1, IQSEC2, HSPA4, PLK…	86	13607	20828	1.2993	0.0224807	0.000528759	0.00044461
GOTERM_CC_ALL	GO:0043227~membrane-bounded organelle	68	75.5556	6.95696e-05	TOP2A, VARS, TRRAP, FMR1, PSIP1, SMC3, SMC2, CSRP2, TRIM28, RUVBL2, RUVBL1, WDR5, UBAP2L, USP7, PARP1, DICER1, DYNLL1, RANGAP1, POLRMT, SMC1A, SENP3, POU5F1, HCFC1, DDB1, MSH6, SFPQ, MSH2, DNAJC7, THRAP3, SNRPG, MCM3, KPNB1, SEC23A, CUL5, DDX21, HSPBP1, AURKA, FXR1, CCNB1, BCLAF1, HSPH1, FXR2, HSF1, E2F1, TDH, ECT2, SF3B1, WDTC1, NXF7, RANBP2, IVNS1ABP, NPM1, HSPA4, PLK1, SAAL1, NAP1L1, ZWINT, AI…	86	12221	20828	1.34757	0.028865	0.000665655	0.000559719
GOTERM_CC_ALL	GO:0000922~spindle pole	7	7.77778	7.41098e-05	NPM1, CCNB1, PLK1, HSF1, SMC1A, SMC3, AURKA	86	172	20828	9.85641	0.0307196	0.000693338	0.000582997
GOTERM_CC_ALL	GO:0044444~cytoplasmic part	57	63.3333	8.21373e-05	TOP2A, VARS, TRRAP, FMR1, HBA-A2, CSRP2, RUVBL2, RUVBL1, UPP2, KCMF1, USP7, PARP1, DICER1, DYNLL1, RANGAP1, POLRMT, SMC1A, POU5F1, MSH6, SFPQ, DNAJC7, SNRPG, MCM3, KPNB1, SEC23A, CUL5, GMPS, DDX21, NT5C2, HSPBP1, AURKA, FXR1, CCNB1, HSPH1, FXR2, HSF1, TDH, ECT2, WDTC1, RANBP2, IVNS1ABP, NPM1, IQSEC2, HSPA4, PLK1, NAP1L1, PAICS, ZWINT, AIMP1, KIF18A, PFKL, SCCPDH, VAPA, HNRNPC, CEP41, SLIRP, EIF3A	86	9374	20828	1.47265	0.0339901	0.000751735	0.0006321
GOTERM_CC_ALL	GO:0034708~methyltransferase complex	6	6.66667	8.41695e-05	RUVBL2, RUVBL1, WDR5, SNRPG, SENP3, HCFC1	86	109	20828	13.3313	0.0348163	0.000753944	0.000633957
GOTERM_CC_ALL	GO:0016363~nuclear matrix	6	6.66667	9.57316e-05	NPM1, SFPQ, RUVBL1, SMC1A, SMC3, SF3B1	86	112	20828	12.9743	0.0395035	0.000839646	0.000706021
GOTERM_CC_ALL	GO:0000228~nuclear chromosome	9	10	0.00011141	TOP2A, TRRAP, RUVBL2, PLK1, RUVBL1, MCM3, SMC1A, SMC3, SMC2	86	360	20828	6.05465	0.0458229	0.000957212	0.000804877
GOTERM_CC_ALL	GO:0005815~microtubule organizing center	13	14.4444	0.000157125	TOP2A, NPM1, PLK1, DYNLL1, AURKA, KIF18A, CCNB1, RUVBL2, HSF1, E2F1, MCM3, CEP41, EIF3A	86	844	20828	3.73035	0.0640139	0.00132299	0.00111244
GOTERM_CC_ALL	GO:0043189~H4/H2A histone acetyltransferase complex	4	4.44444	0.000178753	YEATS2, TRRAP, RUVBL2, RUVBL1	86	27	20828	35.8794	0.0724991	0.00144721	0.00121689
GOTERM_CC_ALL	GO:0035267~NuA4 histone acetyltransferase complex	4	4.44444	0.000178753	YEATS2, TRRAP, RUVBL2, RUVBL1	86	27	20828	35.8794	0.0724991	0.00144721	0.00121689
GOTERM_CC_ALL	GO:1902737~dendritic filopodium	3	3.33333	0.000244284	FXR1, FXR2, FMR1	86	6	20828	121.093	0.0977433	0.00194045	0.00163163
GOTERM_CC_ALL	GO:0035097~histone methyltransferase complex	5	5.55556	0.000292787	RUVBL2, RUVBL1, WDR5, SENP3, HCFC1	86	78	20828	15.5247	0.115985	0.00228265	0.00191938
GOTERM_CC_ALL	GO:0005813~centrosome	11	12.2222	0.000470272	TOP2A, NPM1, CCNB1, RUVBL2, PLK1, HSF1, E2F1, MCM3, CEP41, DYNLL1, AURKA	86	685	20828	3.88912	0.179656	0.00359972	0.00302684
GOTERM_CC_ALL	GO:0016604~nuclear body	12	13.3333	0.000529229	NPM1, USP7, BCLAF1, SFPQ, PARP1, THRAP3, FMR1, HSF1, HBP1, ECT2, SF3B1, ZWINT	86	827	20828	3.51419	0.199777	0.00397867	0.00334548
GOTERM_CC_ALL	GO:0044326~dendritic spine neck	3	3.33333	0.000581628	FXR1, FXR2, FMR1	86	9	20828	80.7287	0.217246	0.00429589	0.00361222
GOTERM_CC_ALL	GO:0044454~nuclear chromosome part	7	7.77778	0.000900053	TRRAP, RUVBL2, PLK1, RUVBL1, MCM3, SMC1A, SMC3	86	274	20828	6.18723	0.315518	0.00653314	0.00549342
GOTERM_CC_ALL	GO:0000812~Swr1 complex	3	3.33333	0.00166963	TRRAP, RUVBL2, RUVBL1	86	15	20828	48.4372	0.50515	0.0119138	0.0100178
GOTERM_CC_ALL	GO:0048471~perinuclear region of cytoplasm	11	12.2222	0.00221265	FXR1, RANBP2, SEC23A, VAPA, FMR1, HSF1, MCM3, SLIRP, DICER1, RANGAP1, AURKA	86	841	20828	3.16771	0.606454	0.0155254	0.0130546
GOTERM_CC_ALL	GO:0030529~intracellular ribonucleoprotein complex	12	13.3333	0.00263672	FXR1, NPM1, FXR2, FMR1, HSF1, SNRPG, HBA-A2, HNRNPC, DICER1, SF3B1, KPNB1, EIF3A	86	1010	20828	2.87746	0.670943	0.0181977	0.0153016
GOTERM_CC_ALL	GO:0000793~condensed chromosome	6	6.66667	0.00313356	TOP2A, CCNB1, PLK1, SMC1A, SMC3, SMC2	86	242	20828	6.00461	0.733211	0.0212779	0.0178916
GOTERM_CC_ALL	GO:0000791~euchromatin	4	4.44444	0.0035844	TRIM28, RUVBL2, HSF1, PSIP1	86	75	20828	12.9166	0.779475	0.0239529	0.0201409
GOTERM_CC_ALL	GO:0032993~protein-DNA complex	6	6.66667	0.00385053	NPM1, PARP1, TRRAP, RUVBL2, RUVBL1, MCM3	86	254	20828	5.72093	0.802931	0.0253293	0.0212982
GOTERM_CC_ALL	GO:0045120~pronucleus	3	3.33333	0.0039387	HSF1, HNRNPC, AURKA	86	23	20828	31.5895	0.81014	0.0255107	0.0214508
GOTERM_CC_ALL	GO:0035770~ribonucleoprotein granule	6	6.66667	0.00467829	FXR1, FXR2, FMR1, HSF1, SNRPG, KPNB1	86	266	20828	5.46284	0.861125	0.0298418	0.0250927
GOTERM_CC_ALL	GO:0097346~INO80-type complex	3	3.33333	0.00622121	TRRAP, RUVBL2, RUVBL1	86	29	20828	25.0537	0.927727	0.0390915	0.0328703
GOTERM_CC_ALL	GO:1990723~cytoplasmic periphery of the nuclear pore complex	2	2.22222	0.00814563	RANBP2, RANGAP1	86	2	20828	242.186	0.968043	0.050431	0.0424052
GOTERM_CC_ALL	GO:0061695~transferase complex, transferring phosphorus-containing groups	6	6.66667	0.00835038	PFKL, CCNB1, TRRAP, PRPS1L1, POLRMT, PRPS1L3	86	306	20828	4.74875	0.970703	0.0509494	0.0428411
GOTERM_CC_ALL	GO:0101031~chaperone complex	3	3.33333	0.00848369	RUVBL2, RUVBL1, HSF1	86	34	20828	21.3694	0.972315	0.0510233	0.0429032
GOTERM_CC_ALL	GO:0032838~cell projection cytoplasm	4	4.44444	0.0095979	SFPQ, FMR1, DYNLL1, RANGAP1	86	107	20828	9.05368	0.982755	0.0569115	0.0478543
GOTERM_CC_ALL	GO:0051233~spindle midzone	3	3.33333	0.0105197	KIF18A, PLK1, AURKA	86	38	20828	19.12	0.988348	0.0615109	0.0517217
GOTERM_CC_ALL	GO:0032301~MutSalpha complex	2	2.22222	0.0121938	MSH6, MSH2	86	3	20828	161.457	0.994288	0.069373	0.0583326
GOTERM_CC_ALL	GO:0044614~nuclear pore cytoplasmic filaments	2	2.22222	0.0121938	RANBP2, RANGAP1	86	3	20828	161.457	0.994288	0.069373	0.0583326
GOTERM_CC_ALL	GO:0005730~nucleolus	10	11.1111	0.0176937	TOP2A, NPM1, MYBBP1A, PARP1, FMR1, DDX21, SENP3, EIF3A, POU5F1, SMC2	86	974	20828	2.48651	0.999456	0.0993208	0.0835144
GOTERM_CC_ALL	GO:0036464~cytoplasmic ribonucleoprotein granule	5	5.55556	0.0187452	FXR1, FXR2, FMR1, SNRPG, KPNB1	86	248	20828	4.88278	0.999653	0.103839	0.0873133
GOTERM_CC_ALL	GO:0097255~R2TP complex	2	2.22222	0.0202413	RUVBL2, RUVBL1	86	5	20828	96.8744	0.999818	0.11067	0.0930573
GOTERM_CC_ALL	GO:0030424~axon	8	8.88889	0.0215372	FXR1, FXR2, FMR1, DICER1, DYNLL1, RANGAP1, HCFC1, AURKA	86	683	20828	2.83673	0.999895	0.116246	0.0977457
GOTERM_CC_ALL	GO:0044815~DNA packaging complex	4	4.44444	0.0231343	TRRAP, RUVBL2, RUVBL1, SMC2	86	149	20828	6.50164	0.999947	0.122956	0.103388
GOTERM_CC_ALL	GO:0005814~centriole	4	4.44444	0.0235384	TOP2A, PLK1, CEP41, AURKA	86	150	20828	6.45829	0.999956	0.122956	0.103388
GOTERM_CC_ALL	GO:0044464~cell part	83	92.2222	0.0241391	TOP2A, VARS, TRRAP, FMR1, PSIP1, HBA-A2, SMC3, SMC2, CSRP2, TRIM28, MDK, RUVBL2, RUVBL1, WDR5, UBAP2L, UPP2, KCMF1, DSP, USP7, PARP1, DICER1, DYNLL1, RANGAP1, POLRMT, SMC1A, SENP3, POU5F1, HCFC1, DDB1, MSH6, SFPQ, MSH2, DNAJC7, THRAP3, SNRPG, MCM3, KPNB1, SEC23A, CUL5, GSTCD, GMPS, DDX21, NT5C2, HSPBP1, AURKA, FXR1, CCNB1, BCLAF1, HSPH1, FXR2, HSF1, E2F1, TDH, ECT2, PRPS1L1, SF3B1, PRPS1L3, WDTC1…	86	18743	20828	1.07248	0.999966	0.122956	0.103388
GOTERM_CC_ALL	GO:0005623~cell	83	92.2222	0.0241391	TOP2A, VARS, TRRAP, FMR1, PSIP1, HBA-A2, SMC3, SMC2, CSRP2, TRIM28, MDK, RUVBL2, RUVBL1, WDR5, UBAP2L, UPP2, KCMF1, DSP, USP7, PARP1, DICER1, DYNLL1, RANGAP1, POLRMT, SMC1A, SENP3, POU5F1, HCFC1, DDB1, MSH6, SFPQ, MSH2, DNAJC7, THRAP3, SNRPG, MCM3, KPNB1, SEC23A, CUL5, GSTCD, GMPS, DDX21, NT5C2, HSPBP1, AURKA, FXR1, CCNB1, BCLAF1, HSPH1, FXR2, HSF1, E2F1, TDH, ECT2, PRPS1L1, SF3B1, PRPS1L3, WDTC1…	86	18743	20828	1.07248	0.999966	0.122956	0.103388
GOTERM_CC_ALL	GO:0002189~ribose phosphate diphosphokinase complex	2	2.22222	0.0242407	PRPS1L1, PRPS1L3	86	6	20828	80.7287	0.999967	0.122956	0.103388
GOTERM_CC_ALL	GO:0099512~supramolecular fiber	10	11.1111	0.0257695	DSP, FXR1, KIF18A, CSRP2, HSPH1, PLK1, UPP2, DYNLL1, EIF3A, AURKA	86	1040	20828	2.32871	0.999983	0.129154	0.1086
GOTERM_CC_ALL	GO:0099081~supramolecular polymer	10	11.1111	0.0269022	DSP, FXR1, KIF18A, CSRP2, HSPH1, PLK1, UPP2, DYNLL1, EIF3A, AURKA	86	1048	20828	2.31094	0.99999	0.132401	0.11133
GOTERM_CC_ALL	GO:0099080~supramolecular complex	10	11.1111	0.0270462	DSP, FXR1, KIF18A, CSRP2, HSPH1, PLK1, UPP2, DYNLL1, EIF3A, AURKA	86	1049	20828	2.30873	0.99999	0.132401	0.11133
GOTERM_CC_ALL	GO:0000790~nuclear chromatin	3	3.33333	0.0273705	TRRAP, RUVBL2, RUVBL1	86	63	20828	11.5327	0.999992	0.132448	0.11137
GOTERM_CC_ALL	GO:1904115~axon cytoplasm	3	3.33333	0.0281798	FMR1, DYNLL1, RANGAP1	86	64	20828	11.3525	0.999994	0.133466	0.112226
GOTERM_CC_ALL	GO:0016607~nuclear speck	6	6.66667	0.028215	NPM1, BCLAF1, SFPQ, THRAP3, HBP1, SF3B1	86	418	20828	3.47635	0.999994	0.133466	0.112226
GOTERM_CC_ALL	GO:0000798~nuclear cohesin complex	2	2.22222	0.0321911	SMC1A, SMC3	86	8	20828	60.5465	0.999999	0.147309	0.123866
GOTERM_CC_ALL	GO:0034991~nuclear meiotic cohesin complex	2	2.22222	0.0321911	SMC1A, SMC3	86	8	20828	60.5465	0.999999	0.147309	0.123866
GOTERM_CC_ALL	GO:0030893~meiotic cohesin complex	2	2.22222	0.0321911	SMC1A, SMC3	86	8	20828	60.5465	0.999999	0.147309	0.123866
GOTERM_CC_ALL	GO:0042564~NLS-dependent protein nuclear import complex	2	2.22222	0.0361423	MYBBP1A, KPNB1	86	9	20828	53.8191	1	0.161871	0.13611
GOTERM_CC_ALL	GO:0032300~mismatch repair complex	2	2.22222	0.0361423	MSH6, MSH2	86	9	20828	53.8191	1	0.161871	0.13611
GOTERM_CC_ALL	GO:0000794~condensed nuclear chromosome	4	4.44444	0.0369208	PLK1, SMC1A, SMC3, SMC2	86	179	20828	5.41198	1	0.163617	0.137579
GOTERM_CC_ALL	GO:0099568~cytoplasmic region	6	6.66667	0.0375944	SFPQ, IQSEC2, FMR1, ECT2, DYNLL1, RANGAP1	86	452	20828	3.21486	1	0.164867	0.138629
GOTERM_CC_ALL	GO:0005874~microtubule	6	6.66667	0.0394267	KIF18A, HSPH1, PLK1, DYNLL1, EIF3A, AURKA	86	458	20828	3.17274	1	0.17112	0.143887
GOTERM_CC_ALL	GO:0008278~cohesin complex	2	2.22222	0.0400776	SMC1A, SMC3	86	10	20828	48.4372	1	0.172112	0.144721
GOTERM_CC_ALL	GO:0005844~polysome	3	3.33333	0.0404729	FXR1, FXR2, FMR1	86	78	20828	9.31485	1	0.172112	0.144721
GOTERM_CC_ALL	GO:0005876~spindle microtubule	3	3.33333	0.0414164	KIF18A, PLK1, AURKA	86	79	20828	9.19694	1	0.174363	0.146614
GOTERM_CC_ALL	GO:0005643~nuclear pore	3	3.33333	0.0433281	RANBP2, RANGAP1, KPNB1	86	81	20828	8.96985	1	0.179832	0.151213
GOTERM_CC_ALL	GO:0044545~NSL complex	2	2.22222	0.0439969	WDR5, HCFC1	86	11	20828	44.0338	1	0.179832	0.151213
GOTERM_CC_ALL	GO:1990062~RPAP3/R2TP/prefoldin-like complex	2	2.22222	0.0439969	RUVBL2, RUVBL1	86	11	20828	44.0338	1	0.179832	0.151213
GOTERM_CC_ALL	GO:0099513~polymeric cytoskeletal fiber	8	8.88889	0.0454049	DSP, KIF18A, HSPH1, PLK1, UPP2, DYNLL1, EIF3A, AURKA	86	802	20828	2.41582	1	0.182778	0.15369
GOTERM_CC_ALL	GO:0005667~transcription factor complex	6	6.66667	0.0455861	SFPQ, PARP1, TRIM28, TRRAP, E2F1, POU5F1	86	477	20828	3.04637	1	0.182778	0.15369
GOTERM_CC_ALL	GO:0070603~SWI/SNF superfamily-type complex	3	3.33333	0.0492553	TRRAP, RUVBL2, RUVBL1	86	87	20828	8.35124	1	0.194978	0.163948
GOTERM_CC_ALL	GO:0030425~dendrite	8	8.88889	0.049555	FXR1, SFPQ, FXR2, FMR1, DICER1, RANGAP1, ZWINT, HCFC1	86	818	20828	2.36857	1	0.194978	0.163948
GOTERM_CC_ALL	GO:0031074~nucleocytoplasmic shuttling complex	2	2.22222	0.0517883	MYBBP1A, KPNB1	86	13	20828	37.2594	1	0.201878	0.169751
GOTERM_CC_ALL	GO:0000940~condensed chromosome outer kinetochore	2	2.22222	0.0556604	CCNB1, PLK1	86	14	20828	34.598	1	0.213028	0.179125
GOTERM_CC_ALL	GO:0005671~Ada2/Gcn5/Ada3 transcription activator complex	2	2.22222	0.0556604	YEATS2, WDR5	86	14	20828	34.598	1	0.213028	0.179125
GOTERM_CC_ALL	GO:0090734~site of DNA damage	3	3.33333	0.0619181	DDB1, CUL5, PARP1	86	99	20828	7.33897	1	0.229945	0.193351
GOTERM_CC_ALL	GO:0090575~RNA polymerase II transcription factor complex	4	4.44444	0.0624992	SFPQ, TRIM28, TRRAP, E2F1	86	222	20828	4.36371	1	0.229945	0.193351
GOTERM_CC_ALL	GO:0031011~Ino80 complex	2	2.22222	0.0633578	RUVBL2, RUVBL1	86	16	20828	30.2733	1	0.229945	0.193351
GOTERM_CC_ALL	GO:0071010~prespliceosome	2	2.22222	0.0633578	SNRPG, SF3B1	86	16	20828	30.2733	1	0.229945	0.193351
GOTERM_CC_ALL	GO:0048188~Set1C/COMPASS complex	2	2.22222	0.0633578	WDR5, HCFC1	86	16	20828	30.2733	1	0.229945	0.193351
GOTERM_CC_ALL	GO:0071004~U2-type prespliceosome	2	2.22222	0.0633578	SNRPG, SF3B1	86	16	20828	30.2733	1	0.229945	0.193351
GOTERM_CC_ALL	GO:0033202~DNA helicase complex	2	2.22222	0.0671832	RUVBL2, RUVBL1	86	17	20828	28.4925	1	0.23876	0.200762
GOTERM_CC_ALL	GO:0071013~catalytic step 2 spliceosome	3	3.33333	0.067488	SNRPG, HNRNPC, SF3B1	86	104	20828	6.98614	1	0.23876	0.200762
GOTERM_CC_ALL	GO:0000792~heterochromatin	3	3.33333	0.067488	TRIM28, HSF1, PSIP1	86	104	20828	6.98614	1	0.23876	0.200762
GOTERM_CC_ALL	GO:0030426~growth cone	4	4.44444	0.0765788	FXR1, FXR2, FMR1, DICER1	86	242	20828	4.00308	1	0.268664	0.225908
GOTERM_CC_ALL	GO:0044798~nuclear transcription factor complex	4	4.44444	0.0780581	SFPQ, TRIM28, TRRAP, E2F1	86	244	20828	3.97026	1	0.271121	0.227973
GOTERM_CC_ALL	GO:0031616~spindle pole centrosome	2	2.22222	0.0785671	NPM1, AURKA	86	20	20828	24.2186	1	0.271121	0.227973
GOTERM_CC_ALL	GO:0030427~site of polarized growth	4	4.44444	0.0818112	FXR1, FXR2, FMR1, DICER1	86	249	20828	3.89054	1	0.28002	0.235457
GOTERM_CC_ALL	GO:0005686~U2 snRNP	2	2.22222	0.0860799	SNRPG, SF3B1	86	22	20828	22.0169	1	0.292255	0.245744
GOTERM_CC_ALL	GO:0030175~filopodium	3	3.33333	0.0888005	FXR1, FXR2, FMR1	86	122	20828	5.95539	1	0.29908	0.251483
GOTERM_CC_ALL	GO:0000777~condensed chromosome kinetochore	2	2.22222	0.0935322	CCNB1, PLK1	86	24	20828	20.1822	1	0.312516	0.262781
GOTERM_CC_ALL	GO:0044450~microtubule organizing center part	4	4.44444	0.0951398	TOP2A, PLK1, CEP41, AURKA	86	266	20828	3.6419	1	0.315385	0.265193
